# Supplementary material for: Primary Defects in β-Cell Function Further Exacerbated by Worsening of Insulin Resistance Mark the Development of Impaired Glucose Tolerance in Obese Adolescents
Source: Oxford University Press journal article supplement (doi:10.2337/dc08-1274), 2008-12-24
Supplement: dc08-1274_online_appendix.doc [file dc08-1274_online_appendix.doc]

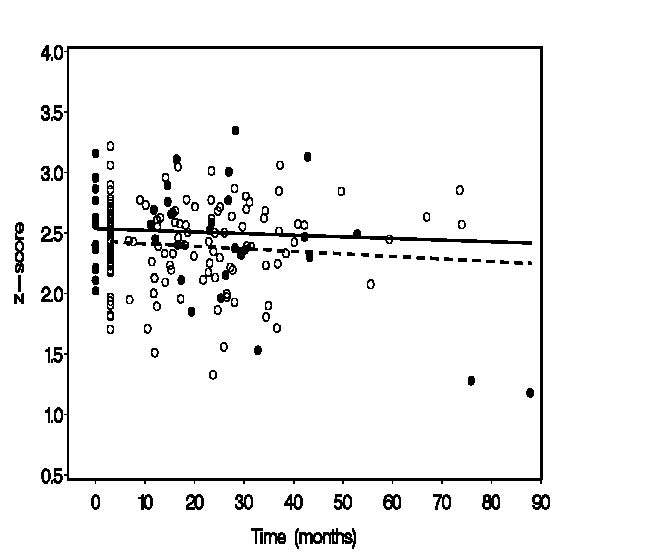


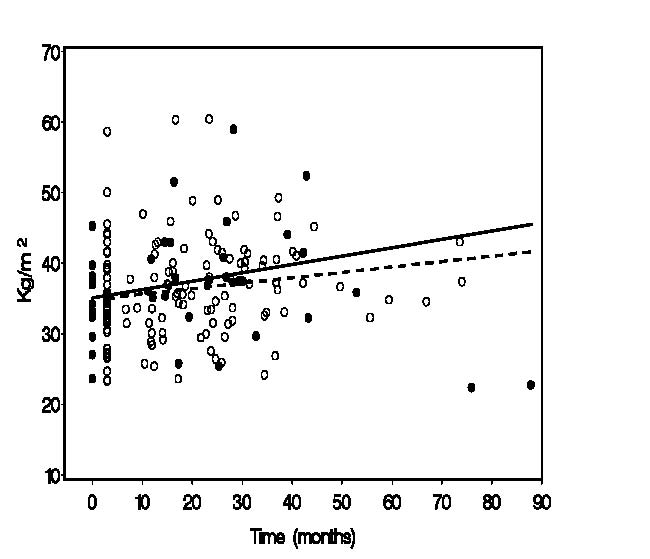


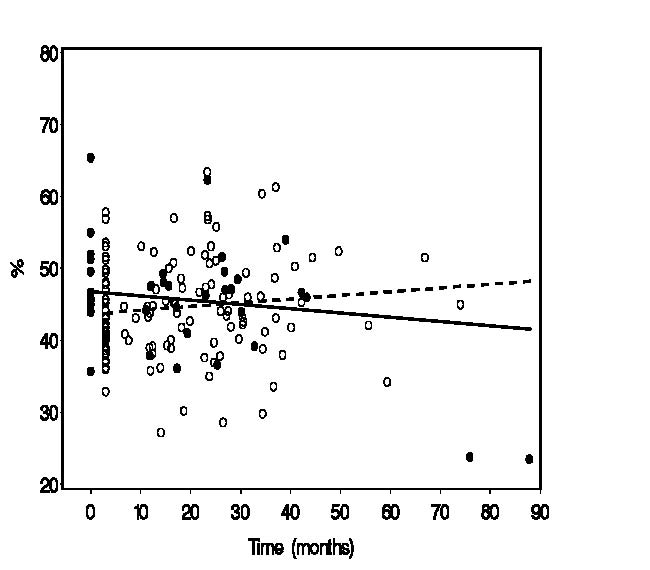


**Body Mass Index**

**Body Mass Index z-score**

**Total Body Fat**

**Figure A 2**

**Figure A 2.** BMI, BMI z-score and % total fat trajectories during the three serial OGTTs in the Progressors (straight line) and Non-Progressors (broken line) respectively.

**Figure A 1**

**Figure A 1 (A-C).** Means plasma glucose, insulin and C-peptide excursions during the OGTT for each of the three serial studies.

Each panel decpicts glucose (left) and insulin (center) levels and C-peptide levels (right) in whom glucose tolerance deteriorated from Normal (NGT) to Impaired (IGT) (Progressors, straight line), compared with those who retained NGT over time (Non-Progressors, broken line). Bar graph insets demonstrate the rise in AUC for glucose, insulin and C-peptide during the OGTT for Progressors (black bar) and the Non-Progressors (white bar). Data are means±SEM. *P<0.05 for test of difference between the two groups.
